# Supplementary material for: Construction of adsorbents with graphene and its derivatives for wastewater treatment: a review
Source: Royal Society of Chemistry journal article supplement (doi:10.1039/d2en00248e), 2022-01-01
Supplement: d2en00248e1.pdf [file d2en00248e1.pdf]

## **Electronic Supplementary Information (ESI)**

**for**

### **Construction of adsorbents with graphene and its derivatives for wastewater treatment: A review**

Huawen Hu<sup>b</sup>, Wu Wen<sup>a,\*</sup>, Jian Zhen Ou<sup>c,\*</sup>

<sup>a</sup> *Guangdong Provincial Key Laboratory of Industrial Surfactant, Institute of Chemical Engineering,  
Guangdong Academy of Sciences, Guangzhou 510006, P.R. China*

<sup>b</sup> *School of Materials Science and Hydrogen Energy, Foshan University, Foshan, 528000, P.R. China*

<sup>c</sup> *School of Engineering, RMIT University, Melbourne, Victoria 3000, Australia*

*Correspondence: [wilsonww123@126.com](mailto:wilsonww123@126.com); [Jianzhen.ou@rmit.edu.au](mailto:Jianzhen.ou@rmit.edu.au)*

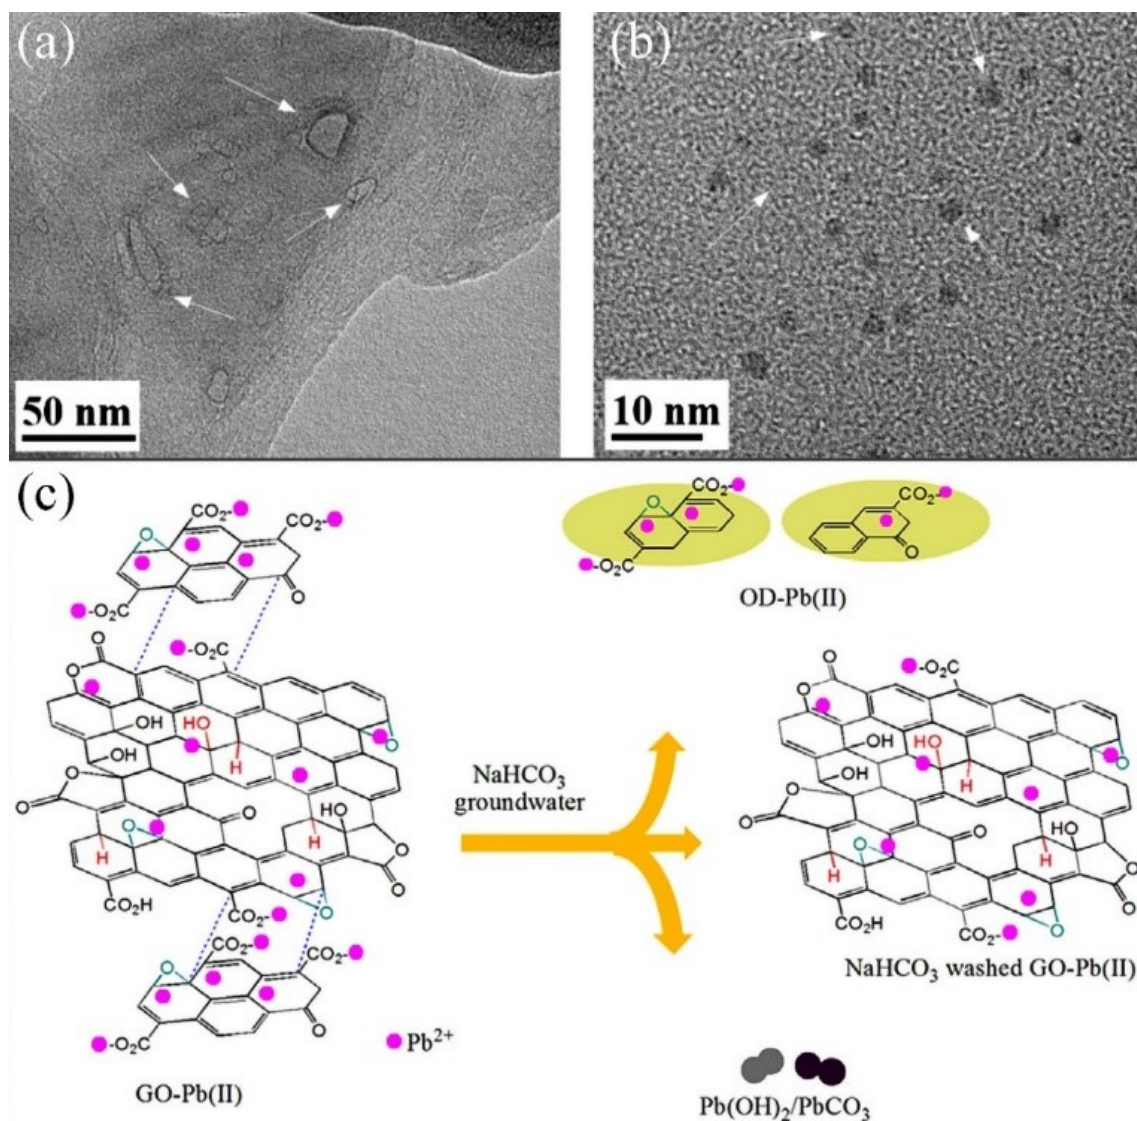

**Figure S1.** a-c) TEM images of GO sheets attached with OD (a) and the OD separated by alkali washing (b), where OD represents oxidative debris, and (c) is the schematic depiction of the fate of GO adsorbed with  $\text{Pb}^{2+}$  under alkaline groundwater conditions. Adapted with permission from the ref.<sup>1</sup> Copyright 2020, Elsevier.

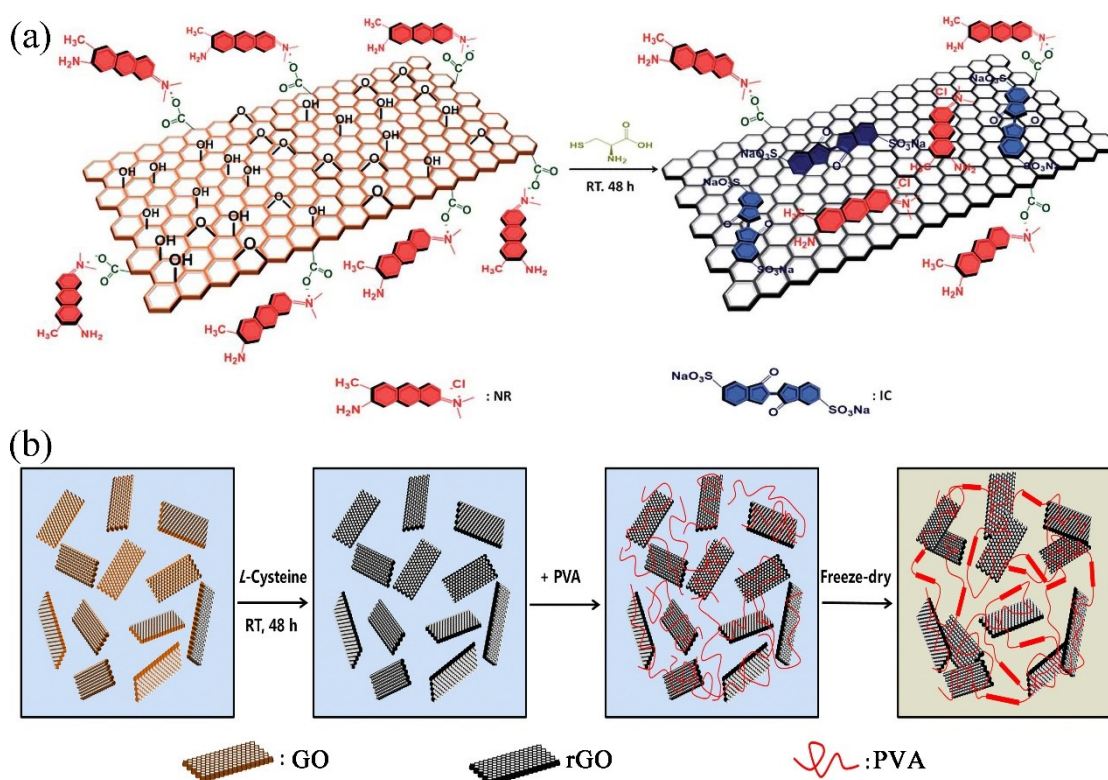

**Figure S2.** a-c) Schematic illustration of the adsorption process using Cys-rGO as the adsorbent (a), and the preparation process of the rGO/PVA aerogels (b). Panels (a) and (b) are reproduced with permission from refs.,<sup>2, 3</sup> with Copyrights 2016, RSC and 2017, Springer, respectively.

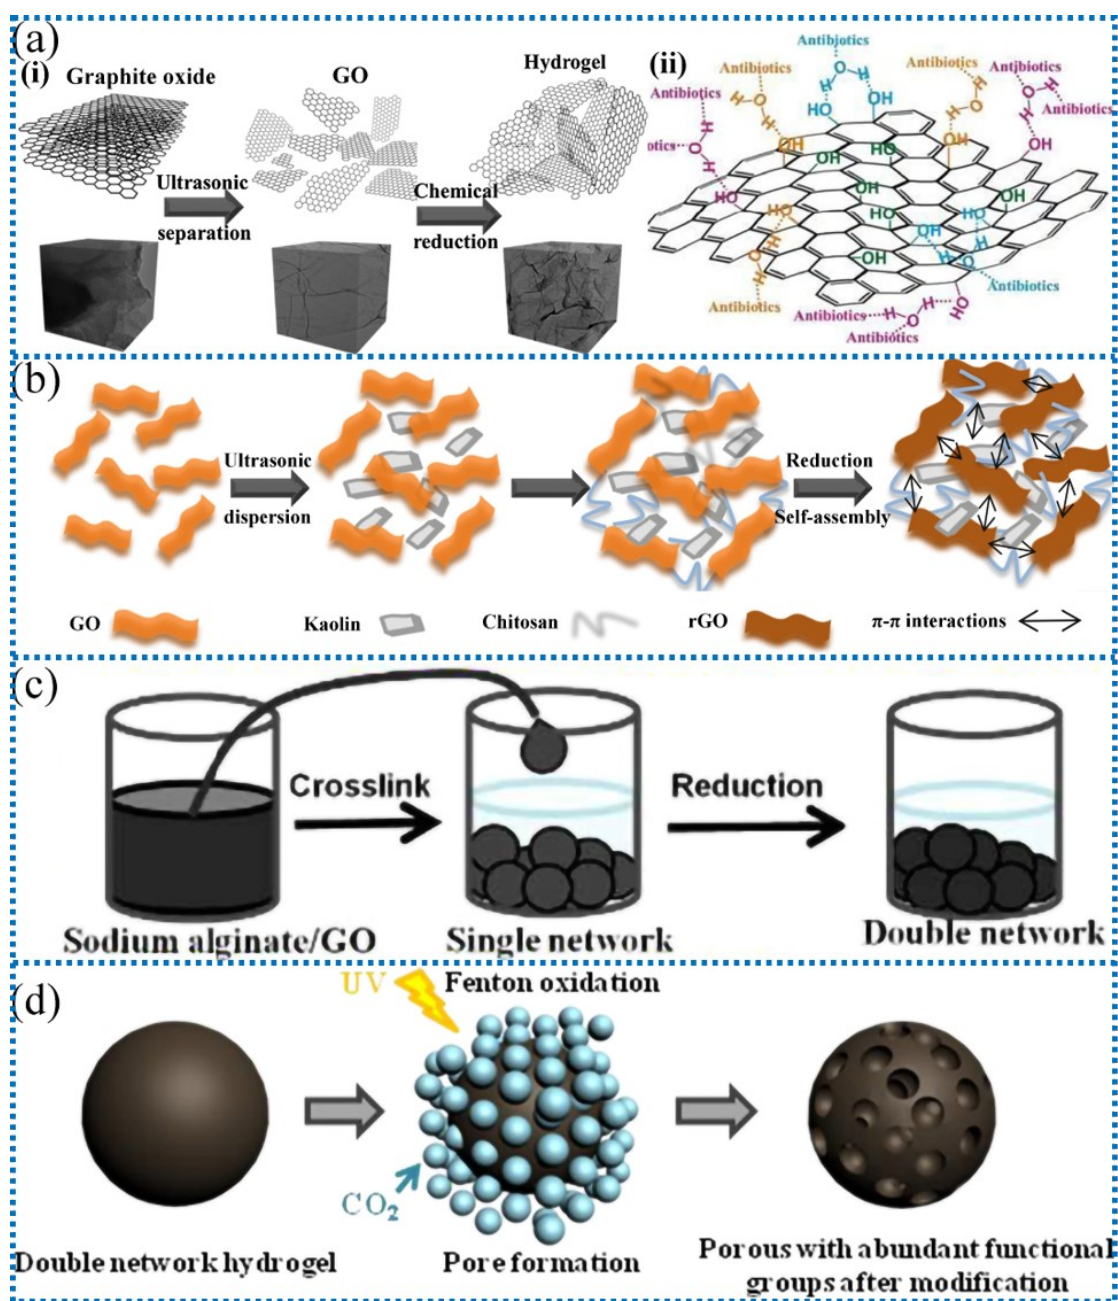

**Figure S3.** (a) Schematic illustration of the fabrication of a 3D graphene hydrogel (i) and water-enhanced mechanism for the graphene hydrogel adsorbent (ii). Adapted with permission from ref.<sup>4</sup> Copyright 2019, Elsevier. (b) Scheme depicting the formation of the kaolin/CS/rGO composite adsorbent. Adapted with permission from ref.<sup>5</sup> Copyright 2019, Springer. (c) Scheme showing the preparation process of alginate/graphene composite hydrogel beads with double crosslinking networks. Reproduced with permission from ref.<sup>6</sup> Copyright 2016, RSC. (d) Scheme illustrating the further physical and chemical modification of the alginate/graphene composite hydrogel. Reproduced with permission from ref.<sup>7</sup> Copyright 2017, Elsevier.



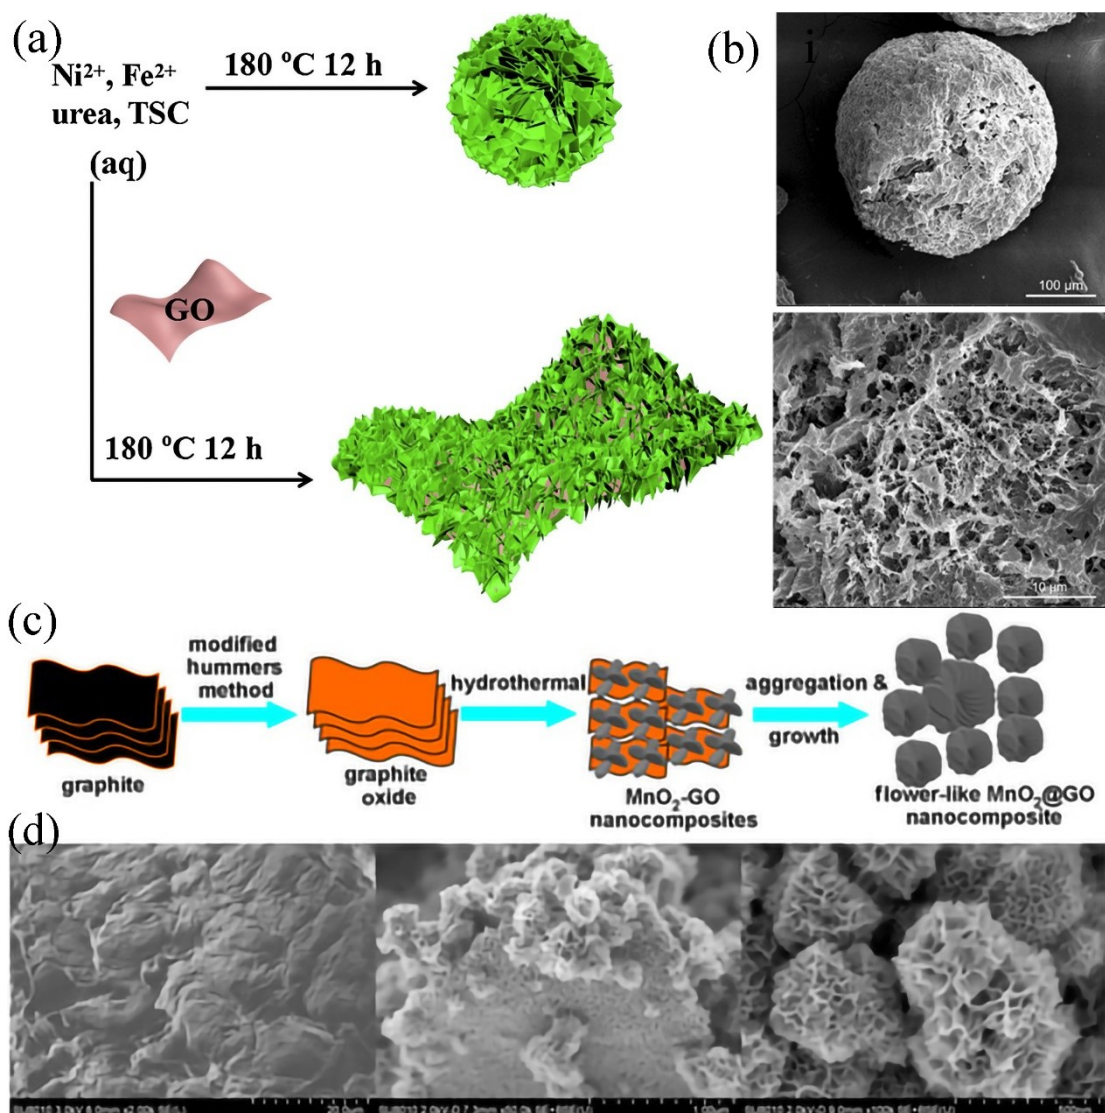

**Figure S4.** (a) Schematic illustration of the synthesis of NiFe LDH microspheres and a GO-NiFe LDH composite. Reproduced with permission from ref.<sup>8</sup> Copyright 2019, Elsevier. (b) SEM image of the 3D graphene microsphere at different magnification scales. Reproduced with permission from ref.<sup>9</sup> Copyright 2017, Springer. (c,d) Schematic illustration (c) and corresponding SEM images (d) of the GO, MnO<sub>2</sub>-GO nanocomposite, and flower-like MnO<sub>2</sub>@GO. Reproduced with permission from ref.<sup>10</sup> Copyright 2017, The Institution of Engineering and Technology.

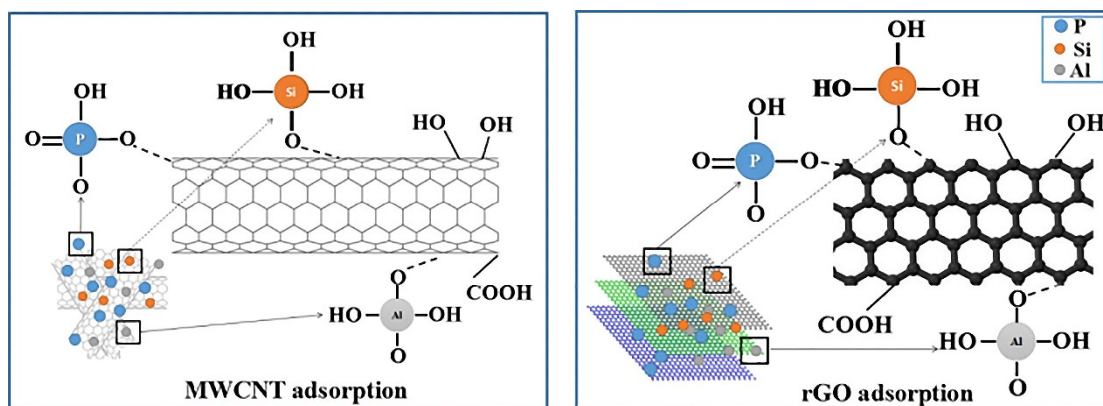

**Figure S5.** Schematic representation of the adsorption of P-, Si-, and Al-containing contaminants onto MWCNTs and rGO adsorbents based on H-bonding interactions. Reproduced with permission from ref.<sup>11</sup> Copyright 2019, Elsevier.



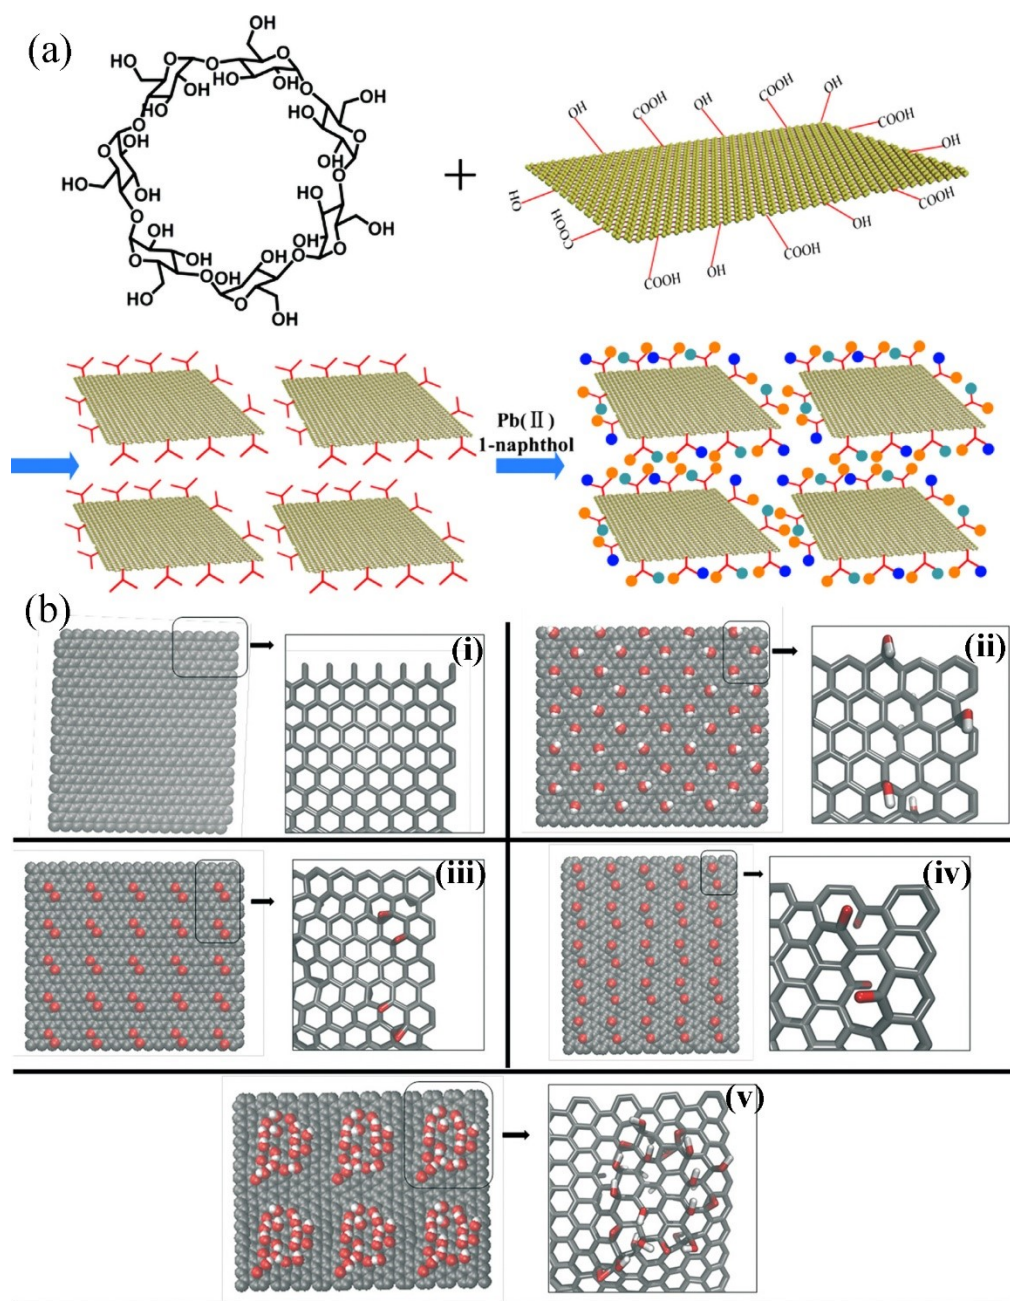

**Figure S7.** Schematic illustration of the preparation of  $\beta$ -cyclodextrin modified GO and its adsorption interactions with 1-naphthol and  $\text{Pb(II)}$ . Reproduced with permission from ref.<sup>14</sup> Copyright 2018, Elsevier. Structural models of different graphenes, including pure graphene and hydroxyl, epoxy, and carboxyl groups-decorated GO. Adapted with permission from ref.<sup>15</sup> Copyright 2018, RSC.



1. J. Zhang, X. Xie, X. Meng, Y. Li and W. Zhu, The critical role of oxidative debris in the adsorption and desorption of Pb(II) to graphene oxides under alkaline groundwater conditions, *Sci. Total Environ.*, 2020, 704.
2. J. Xiao, W. Lv, Z. Xie, Y. Tan, Y. Song and Q. Zheng, Environmentally friendly reduced graphene oxide as a broad-spectrum adsorbent for anionic and cationic dyes via pi-pi interactions, *J. Mater. Chem. A*, 2016, 4, 12126-12135.
3. J. Xiao, W. Lv, Z. Xie, Y. Song and Q. Zheng, L-cysteine-reduced graphene oxide/poly(vinyl alcohol) ultralight aerogel as a broad-spectrum adsorbent for anionic and cationic dyes, *J. Mater. Sci.*, 2017, 52, 5807-5821.
4. F. Yu, Y. Sun, M. Yang and J. Ma, Adsorption mechanism and effect of moisture contents on ciprofloxacin removal by three-dimensional porous graphene hydrogel, *J. Hazard. Mater.*, 2019, 374, 195-202.
5. Y. Zhang, S. Chen, X. Feng, J. Yu and X. Jiang, Self-assembly of sponge-like kaolin/chitosan/reduced graphene oxide composite hydrogels for adsorption of Cr(VI) and AYR, *Environ. Sci. Pollut. Res.*, 2019, 26, 28898-28908.
6. Y. Zhuang, F. Yu, H. Chen, J. Zheng, J. Ma and J. Chen, Alginate/graphene double-network nanocomposite hydrogel beads with low-swelling, enhanced mechanical properties, and enhanced adsorption capacity, *J. Mater. Chem. A*, 2016, 4, 10885-10892.
7. Y. Zhuang, F. Yu, J. Ma and J. Chen, Enhanced adsorption removal of antibiotics from aqueous solutions by modified alginate/graphene double network porous hydrogel, *J. Colloid Interface Sci.*, 2017, 507, 250-259.
8. Y. Zheng, B. Cheng, W. You, J. Yu and W. Ho, 3D hierarchical graphene oxide-NiFe LDH composite with enhanced adsorption affinity to Congo red, methyl orange and Cr(VI) ions, *J. Hazard. Mater.*, 2019, 369, 214-225.
9. R. Wang, W. Guo, X. Li, Z. Liu, H. Liu and S. Ding, Microfluidic generation of 3D graphene microspheres for high-efficiency adsorption, *J. Mater. Sci.*, 2017, 52, 13930-13939.
10. L. Zhang, K. Wu, Y. Zhou, J. Guo, H. Wu, F. Yu and Y. Wu, Synthesis of MnO<sub>2</sub>@graphene oxide flower-like nanocomposite as adsorbent for methyl orange decolouration, *Micro Nano Lett.*, 2017, 12, 335-337.
11. Y. Wang, Q. Yang and H. Huang, Effective adsorption of trace phosphate and aluminum in realistic water by carbon nanotubes and reduced graphene oxides, *Sci. Total Environ.*, 2019, 662, 1003-1011.
12. J. Wu, X. Liang, L. Hao, C. Wang, Q. Wu and Z. Wang, Graphene oxide cross-linked with phytic acid: an efficient adsorbent for the extraction of carbamates, *Microchim. Acta*, 2017, 184, 3773-3779.
13. S. Yang, D. Zhang, H. Cheng, Y. Wang and J. Liu, Graphene oxide as an efficient adsorbent of solid-phase extraction for online preconcentration of inorganic and organic mercurials in freshwater followed by HPLC-ICP-MS determination, *Anal. Chim. Acta*, 2019, 1074, 54-61.
14. H. Zheng, Y. Gao, K. Zhu, Q. Wang, M. Wakeel, A. Wahid, N. S. Alharbi and C. Chen, Investigation of the adsorption mechanisms of Pb(II) and 1-naphthol by beta-cyclodextrin modified graphene oxide nanosheets from aqueous solution, *J. Colloid Interface Sci.*, 2018, 530, 154-162.
15. Y. Wang, J. Comer, Z. Chen, J. Chen and J. C. Gumbart, Exploring adsorption of neutral aromatic pollutants onto graphene nanomaterials via molecular dynamics simulations and theoretical linear solvation energy relationships, *Environ. Sci.-Nano*, 2018, 5, 2117-2128.
